# Supplementary material for: Discovery of potent inhibitors for SARS-CoV-2's main protease by ligand-based/structure-based virtual screening, MD simulations, and binding energy calculations
Source: Royal Society of Chemistry journal article supplement (doi:10.1039/d0cp04326e), 2020-01-01
Supplement: d0cp04326e1.xlsx [file d0cp04326e1.xlsx]

## Sheet: DockingResults_modified
Molecule ID	Binding Affinity (kcal/mol)
DB01200	-9.5
CHEMBL275592	-9
DB01200	-9
DB01232	-9
DB00696	-8.9
DB01232	-8.9
DB08995	-8.9
DB01232	-8.8
DB01232	-8.8
DB00549	-8.7
DB01232	-8.7
DB01232	-8.7
DB01232	-8.7
DB06290	-8.7
DB08995	-8.7
DB09297	-8.7
CHEMBL1256086	-8.6
CHEMBL140704	-8.6
CHEMBL275592	-8.6
DB00320	-8.6
DB01232	-8.6
DB01232	-8.6
CHEMBL116969	-8.5
DB00471	-8.5
DB00471	-8.5
DB00549	-8.5
DB00549	-8.5
DB00694	-8.5
DB00696	-8.5
DB01200	-8.5
DB00471	-8.4
DB00471	-8.4
DB00549	-8.4
DB01177	-8.4
DB01177	-8.4
CHEMBL116969	-8.3
CHEMBL2074811	-8.3
CHEMBL275592	-8.3
CHEMBL288347	-8.3
CHEMBL421410	-8.3
DB00224	-8.3
DB00320	-8.3
DB00320	-8.3
DB00320	-8.3
DB00471	-8.3
DB00559	-8.3
DB00559	-8.3
DB08995	-8.3
CHEMBL275592	-8.2
CHEMBL275592	-8.2
CHEMBL455346	-8.2
CHEMBL509330	-8.2
DB00278	-8.2
DB00278	-8.2
DB00278	-8.2
DB00549	-8.2
DB00559	-8.2
DB00696	-8.2
DB01177	-8.2
DB08934	-8.2
CHEMBL116969	-8.1
CHEMBL1256086	-8.1
CHEMBL140704	-8.1
CHEMBL152817	-8.1
CHEMBL275592	-8.1
CHEMBL288347	-8.1
CHEMBL288347	-8.1
CHEMBL383674	-8.1
CHEMBL421410	-8.1
CHEMBL421410	-8.1
DB00220	-8.1
DB00224	-8.1
DB00549	-8.1
DB00559	-8.1
DB00559	-8.1
DB08827	-8.1
DB08934	-8.1
DB08995	-8.1
DB09235	-8.1
CHEMBL121923	-8
CHEMBL238114	-8
CHEMBL275592	-8
CHEMBL275592	-8
CHEMBL275592	-8
CHEMBL288347	-8
CHEMBL288347	-8
CHEMBL288347	-8
CHEMBL383674	-8
CHEMBL421410	-8
CHEMBL53355	-8
DB00278	-8
DB00293	-8
DB00471	-8
DB00471	-8
DB00503	-8
DB00549	-8
DB00559	-8
DB01061	-8
DB01061	-8
DB01200	-8
DB01200	-8
DB01419	-8
DB01419	-8
DB01601	-8
DB06813	-8
DB08827	-8
DB08827	-8
DB08934	-8
DB08995	-8
DB09235	-8
DB09235	-8
DB09235	-8
CHEMBL187239	-7.9
CHEMBL264866	-7.9
CHEMBL267277	-7.9
CHEMBL288347	-7.9
CHEMBL288347	-7.9
CHEMBL288347	-7.9
CHEMBL315380	-7.9
CHEMBL331645	-7.9
CHEMBL383674	-7.9
CHEMBL421410	-7.9
CHEMBL421410	-7.9
CHEMBL430743	-7.9
DB00220	-7.9
DB00471	-7.9
DB00528	-7.9
DB00549	-7.9
DB00559	-7.9
DB00694	-7.9
DB00696	-7.9
DB00696	-7.9
DB01200	-7.9
DB01220	-7.9
DB01251	-7.9
DB01329	-7.9
DB01419	-7.9
DB04845	-7.9
DB08934	-7.9
DB08995	-7.9
DB14761	-7.9
DB14762	-7.9
DB14763	-7.9
DB14764	-7.9
CHEMBL116969	-7.8
CHEMBL116969	-7.8
CHEMBL116969	-7.8
CHEMBL121923	-7.8
CHEMBL121923	-7.8
CHEMBL1256086	-7.8
CHEMBL1256086	-7.8
CHEMBL1256086	-7.8
CHEMBL1256086	-7.8
CHEMBL140324	-7.8
CHEMBL140324	-7.8
CHEMBL2074811	-7.8
CHEMBL315380	-7.8
CHEMBL3344364	-7.8
CHEMBL341234	-7.8
CHEMBL383674	-7.8
CHEMBL421410	-7.8
CHEMBL430743	-7.8
CHEMBL509330	-7.8
CHEMBL53355	-7.8
CHEMBL53355	-7.8
CHEMBL68229	-7.8
DB00220	-7.8
DB00224	-7.8
DB00224	-7.8
DB00278	-7.8
DB00278	-7.8
DB00278	-7.8
DB00320	-7.8
DB00549	-7.8
DB00616	-7.8
DB00696	-7.8
DB01301	-7.8
DB01601	-7.8
DB04570	-7.8
DB06813	-7.8
DB08827	-7.8
DB08934	-7.8
DB08995	-7.8
DB08995	-7.8
DB08995	-7.8
DB14765	-7.8
DB14766	-7.8
DB14767	-7.8
CHEMBL126085	-7.7
CHEMBL182854	-7.7
CHEMBL182854	-7.7
CHEMBL187239	-7.7
CHEMBL206413	-7.7
CHEMBL2074811	-7.7
CHEMBL324630	-7.7
CHEMBL325241	-7.7
CHEMBL331645	-7.7
CHEMBL331645	-7.7
CHEMBL341234	-7.7
CHEMBL341234	-7.7
CHEMBL383674	-7.7
CHEMBL421410	-7.7
CHEMBL430743	-7.7
CHEMBL430743	-7.7
CHEMBL430743	-7.7
CHEMBL53355	-7.7
CHEMBL553189	-7.7
CHEMBL68229	-7.7
DB00224	-7.7
DB00278	-7.7
DB00319	-7.7
DB00385	-7.7
DB00471	-7.7
DB00559	-7.7
DB00559	-7.7
DB00694	-7.7
DB00696	-7.7
DB00696	-7.7
DB01177	-7.7
DB01264	-7.7
DB01326	-7.7
DB01347	-7.7
DB01419	-7.7
DB01601	-7.7
DB01601	-7.7
DB06796	-7.7
DB06796	-7.7
DB06813	-7.7
DB08816	-7.7
DB08816	-7.7
DB08827	-7.7
DB08827	-7.7
DB09235	-7.7
DB09235	-7.7
DB09235	-7.7
DB09299	-7.7
DB09299	-7.7
DB14768	-7.7
CHEMBL121923	-7.6
CHEMBL121923	-7.6
CHEMBL121923	-7.6
CHEMBL1256086	-7.6
CHEMBL1256086	-7.6
CHEMBL13155	-7.6
CHEMBL13155	-7.6
CHEMBL140324	-7.6
CHEMBL140324	-7.6
CHEMBL152817	-7.6
CHEMBL157441	-7.6
CHEMBL1790527	-7.6
CHEMBL182854	-7.6
CHEMBL187239	-7.6
CHEMBL238114	-7.6
CHEMBL238114	-7.6
CHEMBL264866	-7.6
CHEMBL267277	-7.6
CHEMBL330783	-7.6
CHEMBL331645	-7.6
CHEMBL331645	-7.6
CHEMBL3344267	-7.6
CHEMBL341234	-7.6
CHEMBL341234	-7.6
CHEMBL383674	-7.6
CHEMBL383674	-7.6
CHEMBL404655	-7.6
CHEMBL421410	-7.6
CHEMBL438612	-7.6
CHEMBL445191	-7.6
CHEMBL445191	-7.6
CHEMBL66399	-7.6
CHEMBL68229	-7.6
CHEMBL68229	-7.6
CHEMBL71334	-7.6
DB00212	-7.6
DB00320	-7.6
DB00385	-7.6
DB00616	-7.6
DB00701	-7.6
DB00878	-7.6
DB00932	-7.6
DB01200	-7.6
DB01251	-7.6
DB01264	-7.6
DB01264	-7.6
DB01326	-7.6
DB01326	-7.6
DB01326	-7.6
DB01347	-7.6
DB01347	-7.6
DB01419	-7.6
DB01601	-7.6
DB04570	-7.6
DB06290	-7.6
DB06796	-7.6
DB06796	-7.6
DB06827	-7.6
DB08827	-7.6
DB08934	-7.6
DB08934	-7.6
DB09299	-7.6
DB14769	-7.6
CHEMBL1093632	-7.5
CHEMBL116969	-7.5
CHEMBL121923	-7.5
CHEMBL121923	-7.5
CHEMBL121923	-7.5
CHEMBL1256086	-7.5
CHEMBL126085	-7.5
CHEMBL13155	-7.5
CHEMBL140324	-7.5
CHEMBL152817	-7.5
CHEMBL152817	-7.5
CHEMBL156038	-7.5
CHEMBL157441	-7.5
CHEMBL182854	-7.5
CHEMBL187239	-7.5
CHEMBL187239	-7.5
CHEMBL2074811	-7.5
CHEMBL2074811	-7.5
CHEMBL238114	-7.5
CHEMBL315380	-7.5
CHEMBL315380	-7.5
CHEMBL315380	-7.5
CHEMBL315380	-7.5
CHEMBL324630	-7.5
CHEMBL324630	-7.5
CHEMBL325241	-7.5
CHEMBL325241	-7.5
CHEMBL331645	-7.5
CHEMBL341234	-7.5
CHEMBL344419	-7.5
CHEMBL344419	-7.5
CHEMBL383674	-7.5
CHEMBL383674	-7.5
CHEMBL404655	-7.5
CHEMBL430743	-7.5
CHEMBL455346	-7.5
CHEMBL509330	-7.5
CHEMBL509330	-7.5
CHEMBL509330	-7.5
CHEMBL53355	-7.5
CHEMBL53355	-7.5
CHEMBL553189	-7.5
CHEMBL573443	-7.5
CHEMBL66399	-7.5
CHEMBL68229	-7.5
CHEMBL71334	-7.5
CHEMBL71334	-7.5
CHEMBL71334	-7.5
DB00224	-7.5
DB00224	-7.5
DB00224	-7.5
DB00224	-7.5
DB00319	-7.5
DB00320	-7.5
DB00503	-7.5
DB00528	-7.5
DB00616	-7.5
DB00616	-7.5
DB00694	-7.5
DB00696	-7.5
DB00864	-7.5
DB00932	-7.5
DB00948	-7.5
DB00948	-7.5
DB01061	-7.5
DB01200	-7.5
DB01251	-7.5
DB01251	-7.5
DB01301	-7.5
DB01326	-7.5
DB01347	-7.5
DB01347	-7.5
DB01601	-7.5
DB01601	-7.5
DB01601	-7.5
DB04570	-7.5
DB04570	-7.5
DB04898	-7.5
DB06290	-7.5
DB06290	-7.5
DB06796	-7.5
DB06813	-7.5
DB06827	-7.5
DB08827	-7.5
DB08827	-7.5
DB08934	-7.5
DB08934	-7.5
DB09235	-7.5
DB09235	-7.5
DB09297	-7.5
CHEMBL1093632	-7.4
CHEMBL116483	-7.4
CHEMBL116969	-7.4
CHEMBL116969	-7.4
CHEMBL118557	-7.4
CHEMBL118557	-7.4
CHEMBL126085	-7.4
CHEMBL13155	-7.4
CHEMBL13155	-7.4
CHEMBL140324	-7.4
CHEMBL152817	-7.4
CHEMBL157441	-7.4
CHEMBL2074811	-7.4
CHEMBL2074811	-7.4
CHEMBL238114	-7.4
CHEMBL291719	-7.4
CHEMBL291719	-7.4
CHEMBL315380	-7.4
CHEMBL322945	-7.4
CHEMBL331645	-7.4
CHEMBL341234	-7.4
CHEMBL344419	-7.4
CHEMBL344419	-7.4
CHEMBL344419	-7.4
CHEMBL355777	-7.4
CHEMBL360805	-7.4
CHEMBL382977	-7.4
CHEMBL404655	-7.4
CHEMBL404655	-7.4
CHEMBL404655	-7.4
CHEMBL430743	-7.4
CHEMBL430743	-7.4
CHEMBL437115	-7.4
CHEMBL438612	-7.4
CHEMBL578278	-7.4
CHEMBL578758	-7.4
CHEMBL61309	-7.4
CHEMBL68229	-7.4
CHEMBL68229	-7.4
CHEMBL68229	-7.4
CHEMBL71334	-7.4
CHEMBL71334	-7.4
CHEMBL71334	-7.4
DB00212	-7.4
DB00256	-7.4
DB00256	-7.4
DB00278	-7.4
DB00385	-7.4
DB00385	-7.4
DB00385	-7.4
DB00503	-7.4
DB00528	-7.4
DB00616	-7.4
DB00616	-7.4
DB00701	-7.4
DB00878	-7.4
DB00878	-7.4
DB00932	-7.4
DB01061	-7.4
DB01177	-7.4
DB01200	-7.4
DB01251	-7.4
DB01264	-7.4
DB01264	-7.4
DB01301	-7.4
DB01301	-7.4
DB01329	-7.4
DB01347	-7.4
DB01419	-7.4
DB01601	-7.4
DB06796	-7.4
DB06796	-7.4
DB08816	-7.4
DB08889	-7.4
DB09299	-7.4
CHEMBL1093632	-7.3
CHEMBL116483	-7.3
CHEMBL13155	-7.3
CHEMBL140324	-7.3
CHEMBL140704	-7.3
CHEMBL152817	-7.3
CHEMBL156038	-7.3
CHEMBL157441	-7.3
CHEMBL1790527	-7.3
CHEMBL1790527	-7.3
CHEMBL187239	-7.3
CHEMBL187239	-7.3
CHEMBL187239	-7.3
CHEMBL206413	-7.3
CHEMBL2074811	-7.3
CHEMBL264866	-7.3
CHEMBL264866	-7.3
CHEMBL291719	-7.3
CHEMBL291719	-7.3
CHEMBL291719	-7.3
CHEMBL315380	-7.3
CHEMBL315380	-7.3
CHEMBL319844	-7.3
CHEMBL320637	-7.3
CHEMBL320637	-7.3
CHEMBL324630	-7.3
CHEMBL324630	-7.3
CHEMBL325241	-7.3
CHEMBL330783	-7.3
CHEMBL330783	-7.3
CHEMBL331645	-7.3
CHEMBL331645	-7.3
CHEMBL341234	-7.3
CHEMBL344419	-7.3
CHEMBL344419	-7.3
CHEMBL430743	-7.3
CHEMBL445191	-7.3
CHEMBL455346	-7.3
CHEMBL509330	-7.3
CHEMBL53355	-7.3
CHEMBL553189	-7.3
CHEMBL553189	-7.3
CHEMBL578278	-7.3
CHEMBL61309	-7.3
CHEMBL68229	-7.3
CHEMBL71334	-7.3
CHEMBL71334	-7.3
DB00212	-7.3
DB00212	-7.3
DB00212	-7.3
DB00303	-7.3
DB00303	-7.3
DB00319	-7.3
DB00320	-7.3
DB00385	-7.3
DB00503	-7.3
DB00503	-7.3
DB00528	-7.3
DB00718	-7.3
DB00718	-7.3
DB00878	-7.3
DB00878	-7.3
DB00878	-7.3
DB00932	-7.3
DB00932	-7.3
DB00948	-7.3
DB01061	-7.3
DB01229	-7.3
DB01264	-7.3
DB01264	-7.3
DB01264	-7.3
DB01264	-7.3
DB01326	-7.3
DB01329	-7.3
DB04570	-7.3
DB04570	-7.3
DB06796	-7.3
DB06796	-7.3
DB06813	-7.3
DB08906	-7.3
DB09063	-7.3
DB09063	-7.3
DB09230	-7.3
DB09297	-7.3
CHEMBL116483	-7.2
CHEMBL118557	-7.2
CHEMBL118557	-7.2
CHEMBL13155	-7.2
CHEMBL13155	-7.2
CHEMBL152817	-7.2
CHEMBL156038	-7.2
CHEMBL156038	-7.2
CHEMBL156038	-7.2
CHEMBL157441	-7.2
CHEMBL157441	-7.2
CHEMBL157441	-7.2
CHEMBL157441	-7.2
CHEMBL187239	-7.2
CHEMBL206413	-7.2
CHEMBL206413	-7.2
CHEMBL2074811	-7.2
CHEMBL238114	-7.2
CHEMBL264866	-7.2
CHEMBL264866	-7.2
CHEMBL267277	-7.2
CHEMBL267277	-7.2
CHEMBL267277	-7.2
CHEMBL267277	-7.2
CHEMBL291719	-7.2
CHEMBL291719	-7.2
CHEMBL291719	-7.2
CHEMBL291719	-7.2
CHEMBL320637	-7.2
CHEMBL322945	-7.2
CHEMBL325241	-7.2
CHEMBL330783	-7.2
CHEMBL330783	-7.2
CHEMBL330783	-7.2
CHEMBL330783	-7.2
CHEMBL3344267	-7.2
CHEMBL341234	-7.2
CHEMBL344419	-7.2
CHEMBL344419	-7.2
CHEMBL351766	-7.2
CHEMBL382977	-7.2
CHEMBL382977	-7.2
CHEMBL404655	-7.2
CHEMBL437115	-7.2
CHEMBL438612	-7.2
CHEMBL438612	-7.2
CHEMBL438612	-7.2
CHEMBL445191	-7.2
CHEMBL446278	-7.2
CHEMBL455346	-7.2
CHEMBL455346	-7.2
CHEMBL455346	-7.2
CHEMBL509330	-7.2
CHEMBL53355	-7.2
CHEMBL553189	-7.2
CHEMBL57492	-7.2
CHEMBL57492	-7.2
CHEMBL578278	-7.2
CHEMBL61309	-7.2
CHEMBL61309	-7.2
CHEMBL8969	-7.2
DB00206	-7.2
DB00212	-7.2
DB00212	-7.2
DB00220	-7.2
DB00303	-7.2
DB00319	-7.2
DB00320	-7.2
DB00503	-7.2
DB00503	-7.2
DB00503	-7.2
DB00503	-7.2
DB00528	-7.2
DB00616	-7.2
DB00694	-7.2
DB00701	-7.2
DB00701	-7.2
DB00864	-7.2
DB00932	-7.2
DB00948	-7.2
DB00948	-7.2
DB01061	-7.2
DB01061	-7.2
DB01061	-7.2
DB01251	-7.2
DB01251	-7.2
DB01251	-7.2
DB01301	-7.2
DB01326	-7.2
DB01329	-7.2
DB01329	-7.2
DB01419	-7.2
DB04570	-7.2
DB04865	-7.2
DB04898	-7.2
DB05521	-7.2
DB06290	-7.2
DB06813	-7.2
DB09230	-7.2
DB09272	-7.2
DB09297	-7.2
DB09297	-7.2
DB09297	-7.2
DB09297	-7.2
DB09299	-7.2
DB09299	-7.2
CHEMBL116483	-7.1
CHEMBL126085	-7.1
CHEMBL13155	-7.1
CHEMBL140324	-7.1
CHEMBL140324	-7.1
CHEMBL156038	-7.1
CHEMBL156038	-7.1
CHEMBL156038	-7.1
CHEMBL156038	-7.1
CHEMBL157441	-7.1
CHEMBL1790066	-7.1
CHEMBL1790527	-7.1
CHEMBL1790527	-7.1
CHEMBL182854	-7.1
CHEMBL206413	-7.1
CHEMBL319844	-7.1
CHEMBL319844	-7.1
CHEMBL322945	-7.1
CHEMBL322945	-7.1
CHEMBL322945	-7.1
CHEMBL324630	-7.1
CHEMBL325241	-7.1
CHEMBL325241	-7.1
CHEMBL330783	-7.1
CHEMBL335456	-7.1
CHEMBL3361310	-7.1
CHEMBL360805	-7.1
CHEMBL382977	-7.1
CHEMBL382977	-7.1
CHEMBL404655	-7.1
CHEMBL404655	-7.1
CHEMBL404655	-7.1
CHEMBL434033	-7.1
CHEMBL437115	-7.1
CHEMBL438612	-7.1
CHEMBL438612	-7.1
CHEMBL445191	-7.1
CHEMBL446278	-7.1
CHEMBL446278	-7.1
CHEMBL446278	-7.1
CHEMBL509330	-7.1
CHEMBL53355	-7.1
CHEMBL553189	-7.1
CHEMBL553189	-7.1
CHEMBL553189	-7.1
CHEMBL573443	-7.1
CHEMBL573443	-7.1
CHEMBL573443	-7.1
CHEMBL573443	-7.1
CHEMBL573443	-7.1
CHEMBL573443	-7.1
CHEMBL57492	-7.1
CHEMBL66399	-7.1
CHEMBL66399	-7.1
CHEMBL66399	-7.1
CHEMBL8969	-7.1
CHEMBL8969	-7.1
DB00183	-7.1
DB00206	-7.1
DB00212	-7.1
DB00212	-7.1
DB00220	-7.1
DB00293	-7.1
DB00293	-7.1
DB00385	-7.1
DB00460	-7.1
DB00492	-7.1
DB00492	-7.1
DB00528	-7.1
DB00694	-7.1
DB00701	-7.1
DB00701	-7.1
DB00718	-7.1
DB00718	-7.1
DB00878	-7.1
DB00932	-7.1
DB00932	-7.1
DB01061	-7.1
DB01089	-7.1
DB01177	-7.1
DB01251	-7.1
DB01301	-7.1
DB01326	-7.1
DB01329	-7.1
DB01347	-7.1
DB01419	-7.1
DB01419	-7.1
DB05521	-7.1
DB05521	-7.1
DB06290	-7.1
DB06813	-7.1
DB06813	-7.1
DB08816	-7.1
DB08889	-7.1
DB09065	-7.1
DB09065	-7.1
DB09065	-7.1
DB09230	-7.1
DB09230	-7.1
DB09272	-7.1
DB09297	-7.1
DB09299	-7.1
CHEMBL1093632	-7
CHEMBL126085	-7
CHEMBL126085	-7
CHEMBL126085	-7
CHEMBL129334	-7
CHEMBL140704	-7
CHEMBL152817	-7
CHEMBL1790066	-7
CHEMBL1790527	-7
CHEMBL182854	-7
CHEMBL182854	-7
CHEMBL206413	-7
CHEMBL206413	-7
CHEMBL267277	-7
CHEMBL267277	-7
CHEMBL267277	-7
CHEMBL306947	-7
CHEMBL319844	-7
CHEMBL320637	-7
CHEMBL320637	-7
CHEMBL320637	-7
CHEMBL322945	-7
CHEMBL324630	-7
CHEMBL325241	-7
CHEMBL325241	-7
CHEMBL330783	-7
CHEMBL3344364	-7
CHEMBL3344364	-7
CHEMBL335456	-7
CHEMBL3361310	-7
CHEMBL351766	-7
CHEMBL351766	-7
CHEMBL382977	-7
CHEMBL442013	-7
CHEMBL455346	-7
CHEMBL455346	-7
CHEMBL455346	-7
CHEMBL507767	-7
CHEMBL507767	-7
CHEMBL507767	-7
CHEMBL509330	-7
CHEMBL553189	-7
CHEMBL569788	-7
CHEMBL569788	-7
CHEMBL569788	-7
CHEMBL573443	-7
CHEMBL57492	-7
CHEMBL578124	-7
CHEMBL578278	-7
CHEMBL61309	-7
CHEMBL61309	-7
CHEMBL8969	-7
DB00206	-7
DB00220	-7
DB00303	-7
DB00309	-7
DB00319	-7
DB00319	-7
DB00385	-7
DB00385	-7
DB00492	-7
DB00528	-7
DB00616	-7
DB00616	-7
DB00694	-7
DB00701	-7
DB00864	-7
DB00878	-7
DB00878	-7
DB00895	-7
DB00932	-7
DB00948	-7
DB00948	-7
DB01089	-7
DB01089	-7
DB01177	-7
DB01180	-7
DB01229	-7
DB01326	-7
DB01329	-7
DB01329	-7
DB04570	-7
DB04845	-7
DB04865	-7
DB04898	-7
DB04898	-7
DB05521	-7
DB05521	-7
DB08873	-7
DB08889	-7
DB09063	-7
DB09230	-7
DB09272	-7
DB09272	-7
DB09297	-7
DB09299	-7
DB09299	-7
CHEMBL116483	-6.9
CHEMBL116483	-6.9
CHEMBL118557	-6.9
CHEMBL118557	-6.9
CHEMBL126085	-6.9
CHEMBL152817	-6.9
CHEMBL1790066	-6.9
CHEMBL1790066	-6.9
CHEMBL1790527	-6.9
CHEMBL182854	-6.9
CHEMBL238114	-6.9
CHEMBL264866	-6.9
CHEMBL264866	-6.9
CHEMBL264866	-6.9
CHEMBL306947	-6.9
CHEMBL320637	-6.9
CHEMBL322945	-6.9
CHEMBL322945	-6.9
CHEMBL322945	-6.9
CHEMBL324630	-6.9
CHEMBL324630	-6.9
CHEMBL3344267	-6.9
CHEMBL3357964	-6.9
CHEMBL3361310	-6.9
CHEMBL351766	-6.9
CHEMBL351766	-6.9
CHEMBL351766	-6.9
CHEMBL360805	-6.9
CHEMBL379771	-6.9
CHEMBL379771	-6.9
CHEMBL379771	-6.9
CHEMBL382977	-6.9
CHEMBL426711	-6.9
CHEMBL434033	-6.9
CHEMBL437115	-6.9
CHEMBL437115	-6.9
CHEMBL438612	-6.9
CHEMBL442013	-6.9
CHEMBL442013	-6.9
CHEMBL442013	-6.9
CHEMBL445191	-6.9
CHEMBL446278	-6.9
CHEMBL446278	-6.9
CHEMBL446278	-6.9
CHEMBL446278	-6.9
CHEMBL446278	-6.9
CHEMBL507767	-6.9
CHEMBL507767	-6.9
CHEMBL507767	-6.9
CHEMBL554395	-6.9
CHEMBL569788	-6.9
CHEMBL569788	-6.9
CHEMBL573443	-6.9
CHEMBL57492	-6.9
CHEMBL57492	-6.9
CHEMBL57492	-6.9
CHEMBL57492	-6.9
CHEMBL578278	-6.9
CHEMBL578278	-6.9
CHEMBL78459	-6.9
CHEMBL85651	-6.9
CHEMBL8969	-6.9
DB00206	-6.9
DB00206	-6.9
DB00220	-6.9
DB00293	-6.9
DB00303	-6.9
DB00319	-6.9
DB00410	-6.9
DB00460	-6.9
DB00492	-6.9
DB00528	-6.9
DB00694	-6.9
DB00694	-6.9
DB00701	-6.9
DB00701	-6.9
DB00718	-6.9
DB00718	-6.9
DB00895	-6.9
DB00976	-6.9
DB01089	-6.9
DB01089	-6.9
DB01089	-6.9
DB01089	-6.9
DB01180	-6.9
DB01319	-6.9
DB01319	-6.9
DB01347	-6.9
DB01347	-6.9
DB04570	-6.9
DB04865	-6.9
DB05521	-6.9
DB05521	-6.9
DB05521	-6.9
DB06813	-6.9
DB06827	-6.9
DB06827	-6.9
DB08816	-6.9
DB08889	-6.9
DB08889	-6.9
DB09065	-6.9
DB09065	-6.9
DB09230	-6.9
DB09230	-6.9
DB09272	-6.9
CHEMBL116483	-6.8
CHEMBL116483	-6.8
CHEMBL116483	-6.8
CHEMBL118557	-6.8
CHEMBL118557	-6.8
CHEMBL126085	-6.8
CHEMBL140704	-6.8
CHEMBL140704	-6.8
CHEMBL140704	-6.8
CHEMBL1790064	-6.8
CHEMBL1790066	-6.8
CHEMBL1790066	-6.8
CHEMBL1790527	-6.8
CHEMBL206413	-6.8
CHEMBL206413	-6.8
CHEMBL238114	-6.8
CHEMBL238114	-6.8
CHEMBL306947	-6.8
CHEMBL306947	-6.8
CHEMBL306947	-6.8
CHEMBL309507	-6.8
CHEMBL309507	-6.8
CHEMBL309507	-6.8
CHEMBL319844	-6.8
CHEMBL319844	-6.8
CHEMBL320637	-6.8
CHEMBL320637	-6.8
CHEMBL330596	-6.8
CHEMBL3344364	-6.8
CHEMBL3344364	-6.8
CHEMBL3361310	-6.8
CHEMBL351766	-6.8
CHEMBL351766	-6.8
CHEMBL351766	-6.8
CHEMBL355777	-6.8
CHEMBL379771	-6.8
CHEMBL379771	-6.8
CHEMBL382977	-6.8
CHEMBL382977	-6.8
CHEMBL404813	-6.8
CHEMBL426711	-6.8
CHEMBL426711	-6.8
CHEMBL426711	-6.8
CHEMBL437115	-6.8
CHEMBL437115	-6.8
CHEMBL437115	-6.8
CHEMBL437115	-6.8
CHEMBL438612	-6.8
CHEMBL445191	-6.8
CHEMBL507767	-6.8
CHEMBL507767	-6.8
CHEMBL554395	-6.8
CHEMBL554395	-6.8
CHEMBL57492	-6.8
CHEMBL578278	-6.8
CHEMBL578278	-6.8
CHEMBL578278	-6.8
CHEMBL578758	-6.8
CHEMBL578758	-6.8
CHEMBL578758	-6.8
CHEMBL61309	-6.8
CHEMBL61309	-6.8
CHEMBL66399	-6.8
CHEMBL66399	-6.8
CHEMBL66399	-6.8
CHEMBL66399	-6.8
CHEMBL8969	-6.8
CHEMBL8969	-6.8
CHEMBL8969	-6.8
DB00183	-6.8
DB00206	-6.8
DB00206	-6.8
DB00256	-6.8
DB00293	-6.8
DB00319	-6.8
DB00460	-6.8
DB00528	-6.8
DB00718	-6.8
DB00718	-6.8
DB00718	-6.8
DB00864	-6.8
DB00895	-6.8
DB00895	-6.8
DB00947	-6.8
DB01089	-6.8
DB01089	-6.8
DB01118	-6.8
DB01177	-6.8
DB01177	-6.8
DB01220	-6.8
DB01248	-6.8
DB01301	-6.8
DB01301	-6.8
DB01319	-6.8
DB01319	-6.8
DB01329	-6.8
DB01764	-6.8
DB04865	-6.8
DB04865	-6.8
DB04865	-6.8
DB04898	-6.8
DB04898	-6.8
DB05521	-6.8
DB06290	-6.8
DB08816	-6.8
DB08816	-6.8
DB08873	-6.8
DB08889	-6.8
DB08889	-6.8
DB08889	-6.8
DB08889	-6.8
DB08906	-6.8
DB09063	-6.8
DB09063	-6.8
DB09063	-6.8
DB09063	-6.8
DB09065	-6.8
DB09065	-6.8
DB09065	-6.8
DB09065	-6.8
DB09230	-6.8
DB09230	-6.8
DB09272	-6.8
CHEMBL1093982	-6.7
CHEMBL1093982	-6.7
CHEMBL118557	-6.7
CHEMBL140704	-6.7
CHEMBL140704	-6.7
CHEMBL1790066	-6.7
CHEMBL1790066	-6.7
CHEMBL1790066	-6.7
CHEMBL1790527	-6.7
CHEMBL182854	-6.7
CHEMBL2112937	-6.7
CHEMBL30521	-6.7
CHEMBL309507	-6.7
CHEMBL309507	-6.7
CHEMBL319844	-6.7
CHEMBL319844	-6.7
CHEMBL3344267	-6.7
CHEMBL3344364	-6.7
CHEMBL3357964	-6.7
CHEMBL360805	-6.7
CHEMBL360805	-6.7
CHEMBL379771	-6.7
CHEMBL379771	-6.7
CHEMBL382203	-6.7
CHEMBL382203	-6.7
CHEMBL426711	-6.7
CHEMBL426711	-6.7
CHEMBL442013	-6.7
CHEMBL507767	-6.7
CHEMBL554395	-6.7
CHEMBL554395	-6.7
CHEMBL569788	-6.7
CHEMBL578343	-6.7
CHEMBL578758	-6.7
CHEMBL578758	-6.7
CHEMBL61309	-6.7
CHEMBL85651	-6.7
CHEMBL8969	-6.7
DB00183	-6.7
DB00183	-6.7
DB00220	-6.7
DB00220	-6.7
DB00293	-6.7
DB00293	-6.7
DB00303	-6.7
DB00303	-6.7
DB00319	-6.7
DB00460	-6.7
DB00492	-6.7
DB00948	-6.7
DB01072	-6.7
DB01072	-6.7
DB01118	-6.7
DB01180	-6.7
DB01248	-6.7
DB01248	-6.7
DB01319	-6.7
DB01319	-6.7
DB01602	-6.7
DB01602	-6.7
DB01602	-6.7
DB01764	-6.7
DB04865	-6.7
DB04865	-6.7
DB04865	-6.7
DB04898	-6.7
DB04898	-6.7
DB04898	-6.7
DB05109	-6.7
DB06290	-6.7
DB08816	-6.7
DB08873	-6.7
DB08873	-6.7
DB08906	-6.7
DB09272	-6.7
CHEMBL1093632	-6.6
CHEMBL1093982	-6.6
CHEMBL1093982	-6.6
CHEMBL1790064	-6.6
CHEMBL1790064	-6.6
CHEMBL2112937	-6.6
CHEMBL2112937	-6.6
CHEMBL30521	-6.6
CHEMBL306947	-6.6
CHEMBL306947	-6.6
CHEMBL306947	-6.6
CHEMBL306947	-6.6
CHEMBL309507	-6.6
CHEMBL309507	-6.6
CHEMBL319844	-6.6
CHEMBL3344267	-6.6
CHEMBL3344267	-6.6
CHEMBL3344267	-6.6
CHEMBL3344267	-6.6
CHEMBL3344364	-6.6
CHEMBL3344364	-6.6
CHEMBL3344364	-6.6
CHEMBL335456	-6.6
CHEMBL3357964	-6.6
CHEMBL3357964	-6.6
CHEMBL3361310	-6.6
CHEMBL3361310	-6.6
CHEMBL355777	-6.6
CHEMBL360805	-6.6
CHEMBL360805	-6.6
CHEMBL360805	-6.6
CHEMBL360805	-6.6
CHEMBL379771	-6.6
CHEMBL426711	-6.6
CHEMBL442013	-6.6
CHEMBL442013	-6.6
CHEMBL442013	-6.6
CHEMBL445191	-6.6
CHEMBL554395	-6.6
CHEMBL554395	-6.6
CHEMBL574931	-6.6
CHEMBL578124	-6.6
CHEMBL578343	-6.6
CHEMBL578758	-6.6
CHEMBL578758	-6.6
CHEMBL578758	-6.6
CHEMBL85651	-6.6
CHEMBL85651	-6.6
DB00206	-6.6
DB00256	-6.6
DB00293	-6.6
DB00303	-6.6
DB00361	-6.6
DB00410	-6.6
DB00460	-6.6
DB00492	-6.6
DB00492	-6.6
DB00615	-6.6
DB00947	-6.6
DB01072	-6.6
DB01180	-6.6
DB01180	-6.6
DB01180	-6.6
DB01229	-6.6
DB01229	-6.6
DB01229	-6.6
DB01248	-6.6
DB01248	-6.6
DB01301	-6.6
DB01319	-6.6
DB01602	-6.6
DB01602	-6.6
DB04845	-6.6
DB06290	-6.6
DB08816	-6.6
DB08873	-6.6
DB09026	-6.6
DB09026	-6.6
DB09063	-6.6
DB09272	-6.6
DB09272	-6.6
CHEMBL129334	-6.5
CHEMBL1790064	-6.5
CHEMBL1790064	-6.5
CHEMBL1790064	-6.5
CHEMBL2112937	-6.5
CHEMBL2112937	-6.5
CHEMBL309507	-6.5
CHEMBL309507	-6.5
CHEMBL3344267	-6.5
CHEMBL335456	-6.5
CHEMBL335456	-6.5
CHEMBL335456	-6.5
CHEMBL335456	-6.5
CHEMBL3361310	-6.5
CHEMBL340774	-6.5
CHEMBL340774	-6.5
CHEMBL355777	-6.5
CHEMBL355777	-6.5
CHEMBL355777	-6.5
CHEMBL379771	-6.5
CHEMBL404031	-6.5
CHEMBL404031	-6.5
CHEMBL404813	-6.5
CHEMBL426711	-6.5
CHEMBL426711	-6.5
CHEMBL434033	-6.5
CHEMBL442013	-6.5
CHEMBL554395	-6.5
CHEMBL554395	-6.5
CHEMBL569788	-6.5
CHEMBL569788	-6.5
CHEMBL574931	-6.5
CHEMBL578343	-6.5
CHEMBL67944	-6.5
CHEMBL67944	-6.5
CHEMBL78459	-6.5
CHEMBL85651	-6.5
CHEMBL85651	-6.5
DB00183	-6.5
DB00183	-6.5
DB00183	-6.5
DB00183	-6.5
DB00206	-6.5
DB00256	-6.5
DB00256	-6.5
DB00293	-6.5
DB00303	-6.5
DB00309	-6.5
DB00492	-6.5
DB00895	-6.5
DB00895	-6.5
DB00976	-6.5
DB01072	-6.5
DB01072	-6.5
DB01072	-6.5
DB01180	-6.5
DB01180	-6.5
DB01180	-6.5
DB01319	-6.5
DB01764	-6.5
DB04845	-6.5
DB08873	-6.5
DB08873	-6.5
DB08906	-6.5
DB09026	-6.5
DB09026	-6.5
CHEMBL129334	-6.4
CHEMBL2112937	-6.4
CHEMBL2112937	-6.4
CHEMBL30521	-6.4
CHEMBL30521	-6.4
CHEMBL330596	-6.4
CHEMBL330596	-6.4
CHEMBL3357964	-6.4
CHEMBL3361310	-6.4
CHEMBL3361310	-6.4
CHEMBL340774	-6.4
CHEMBL382203	-6.4
CHEMBL382203	-6.4
CHEMBL404031	-6.4
CHEMBL404031	-6.4
CHEMBL404813	-6.4
CHEMBL404813	-6.4
CHEMBL445191	-6.4
CHEMBL54110	-6.4
CHEMBL569788	-6.4
CHEMBL578343	-6.4
CHEMBL78459	-6.4
CHEMBL78459	-6.4
CHEMBL78459	-6.4
CHEMBL78459	-6.4
CHEMBL85651	-6.4
CHEMBL85651	-6.4
DB00183	-6.4
DB00256	-6.4
DB00256	-6.4
DB00410	-6.4
DB00460	-6.4
DB00460	-6.4
DB00460	-6.4
DB00492	-6.4
DB00895	-6.4
DB00895	-6.4
DB00895	-6.4
DB00948	-6.4
DB00976	-6.4
DB01072	-6.4
DB01072	-6.4
DB01072	-6.4
DB01220	-6.4
DB01220	-6.4
DB01248	-6.4
DB01248	-6.4
DB01319	-6.4
DB04845	-6.4
DB06772	-6.4
DB08884	-6.4
DB08906	-6.4
DB09026	-6.4
DB09026	-6.4
DB09063	-6.4
CHEMBL1093632	-6.3
CHEMBL1093632	-6.3
CHEMBL1093982	-6.3
CHEMBL129334	-6.3
CHEMBL129334	-6.3
CHEMBL1790064	-6.3
CHEMBL1790064	-6.3
CHEMBL1790064	-6.3
CHEMBL2112937	-6.3
CHEMBL287202	-6.3
CHEMBL30521	-6.3
CHEMBL320685	-6.3
CHEMBL330596	-6.3
CHEMBL331808	-6.3
CHEMBL335456	-6.3
CHEMBL335456	-6.3
CHEMBL339562	-6.3
CHEMBL355777	-6.3
CHEMBL382203	-6.3
CHEMBL382203	-6.3
CHEMBL404031	-6.3
CHEMBL404031	-6.3
CHEMBL404813	-6.3
CHEMBL434033	-6.3
CHEMBL434033	-6.3
CHEMBL434033	-6.3
CHEMBL54110	-6.3
CHEMBL578124	-6.3
CHEMBL578343	-6.3
CHEMBL67944	-6.3
CHEMBL78459	-6.3
CHEMBL78459	-6.3
DB00256	-6.3
DB00410	-6.3
DB00410	-6.3
DB00460	-6.3
DB00541	-6.3
DB00615	-6.3
DB00743	-6.3
DB00743	-6.3
DB00976	-6.3
DB00976	-6.3
DB01076	-6.3
DB01118	-6.3
DB01220	-6.3
DB01602	-6.3
DB04845	-6.3
DB04845	-6.3
DB06439	-6.3
DB06439	-6.3
DB06439	-6.3
DB06772	-6.3
DB08873	-6.3
DB08906	-6.3
DB09026	-6.3
DB09026	-6.3
CHEMBL1093632	-6.2
CHEMBL1093632	-6.2
CHEMBL1093982	-6.2
CHEMBL1093982	-6.2
CHEMBL1093982	-6.2
CHEMBL2112937	-6.2
CHEMBL287202	-6.2
CHEMBL287202	-6.2
CHEMBL287202	-6.2
CHEMBL30521	-6.2
CHEMBL30521	-6.2
CHEMBL30521	-6.2
CHEMBL30521	-6.2
CHEMBL320685	-6.2
CHEMBL320685	-6.2
CHEMBL330596	-6.2
CHEMBL331808	-6.2
CHEMBL3357964	-6.2
CHEMBL340774	-6.2
CHEMBL340774	-6.2
CHEMBL340774	-6.2
CHEMBL340774	-6.2
CHEMBL355777	-6.2
CHEMBL355777	-6.2
CHEMBL404031	-6.2
CHEMBL404813	-6.2
CHEMBL404813	-6.2
CHEMBL404813	-6.2
CHEMBL432984	-6.2
CHEMBL54110	-6.2
CHEMBL54110	-6.2
CHEMBL574931	-6.2
CHEMBL574931	-6.2
CHEMBL578124	-6.2
CHEMBL578124	-6.2
CHEMBL578124	-6.2
CHEMBL578124	-6.2
CHEMBL578343	-6.2
CHEMBL67944	-6.2
CHEMBL67944	-6.2
CHEMBL78459	-6.2
CHEMBL85651	-6.2
DB00309	-6.2
DB00410	-6.2
DB00410	-6.2
DB00541	-6.2
DB00743	-6.2
DB00947	-6.2
DB00947	-6.2
DB01045	-6.2
DB01076	-6.2
DB01076	-6.2
DB01229	-6.2
DB01248	-6.2
DB01248	-6.2
DB01602	-6.2
DB01602	-6.2
DB01602	-6.2
DB04845	-6.2
DB06439	-6.2
DB06827	-6.2
DB08873	-6.2
DB08884	-6.2
DB08884	-6.2
DB08884	-6.2
DB08906	-6.2
DB08906	-6.2
DB09026	-6.2
DB09296	-6.2
CHEMBL1093982	-6.1
CHEMBL129334	-6.1
CHEMBL287202	-6.1
CHEMBL287202	-6.1
CHEMBL287202	-6.1
CHEMBL287202	-6.1
CHEMBL293562	-6.1
CHEMBL330596	-6.1
CHEMBL330596	-6.1
CHEMBL331808	-6.1
CHEMBL331808	-6.1
CHEMBL339562	-6.1
CHEMBL340774	-6.1
CHEMBL340774	-6.1
CHEMBL382203	-6.1
CHEMBL404031	-6.1
CHEMBL404031	-6.1
CHEMBL404813	-6.1
CHEMBL432984	-6.1
CHEMBL432984	-6.1
CHEMBL432984	-6.1
CHEMBL434033	-6.1
CHEMBL434033	-6.1
CHEMBL454263	-6.1
CHEMBL454263	-6.1
CHEMBL54110	-6.1
CHEMBL54110	-6.1
CHEMBL574931	-6.1
CHEMBL574931	-6.1
CHEMBL574931	-6.1
CHEMBL574931	-6.1
CHEMBL578124	-6.1
CHEMBL578124	-6.1
CHEMBL578343	-6.1
CHEMBL58760	-6.1
CHEMBL67944	-6.1
CHEMBL67944	-6.1
CHEMBL67944	-6.1
DB00361	-6.1
DB00410	-6.1
DB00615	-6.1
DB00743	-6.1
DB00743	-6.1
DB00746	-6.1
DB00746	-6.1
DB00864	-6.1
DB00947	-6.1
DB00947	-6.1
DB00976	-6.1
DB00976	-6.1
DB01076	-6.1
DB01118	-6.1
DB04855	-6.1
DB05109	-6.1
DB05109	-6.1
DB06439	-6.1
DB06439	-6.1
DB06439	-6.1
DB08884	-6.1
DB08884	-6.1
DB09296	-6.1
CHEMBL129334	-6
CHEMBL287202	-6
CHEMBL330596	-6
CHEMBL330596	-6
CHEMBL3357964	-6
CHEMBL3357964	-6
CHEMBL339562	-6
CHEMBL382203	-6
CHEMBL382203	-6
CHEMBL432984	-6
CHEMBL432984	-6
CHEMBL434033	-6
CHEMBL54110	-6
CHEMBL574931	-6
CHEMBL578343	-6
CHEMBL578343	-6
CHEMBL58760	-6
CHEMBL58760	-6
CHEMBL58760	-6
DB00410	-6
DB00541	-6
DB00743	-6
DB00743	-6
DB00743	-6
DB00743	-6
DB00746	-6
DB00746	-6
DB00746	-6
DB00746	-6
DB00864	-6
DB00864	-6
DB00864	-6
DB00976	-6
DB00976	-6
DB01076	-6
DB01076	-6
DB01076	-6
DB01118	-6
DB01118	-6
DB01118	-6
DB01118	-6
DB01220	-6
DB01220	-6
DB01229	-6
DB01229	-6
DB01229	-6
DB04855	-6
DB04855	-6
DB04855	-6
DB04855	-6
DB04855	-6
DB05109	-6
DB05109	-6
DB05109	-6
DB06439	-6
DB06439	-6
DB06772	-6
DB08884	-6
DB08884	-6
DB08884	-6
DB08906	-6
CHEMBL129334	-5.9
CHEMBL293562	-5.9
CHEMBL293562	-5.9
CHEMBL320685	-5.9
CHEMBL331808	-5.9
CHEMBL331808	-5.9
CHEMBL339562	-5.9
CHEMBL339562	-5.9
CHEMBL432984	-5.9
CHEMBL54110	-5.9
CHEMBL54110	-5.9
CHEMBL58760	-5.9
CHEMBL58760	-5.9
CHEMBL67944	-5.9
DB00746	-5.9
DB00746	-5.9
DB00864	-5.9
DB00947	-5.9
DB01118	-5.9
DB04855	-5.9
DB04855	-5.9
DB04855	-5.9
DB06827	-5.9
DB09049	-5.9
CHEMBL129334	-5.8
CHEMBL293562	-5.8
CHEMBL293562	-5.8
CHEMBL293562	-5.8
CHEMBL320685	-5.8
CHEMBL320685	-5.8
CHEMBL320685	-5.8
CHEMBL320685	-5.8
CHEMBL320685	-5.8
CHEMBL331808	-5.8
CHEMBL3357964	-5.8
CHEMBL432984	-5.8
CHEMBL58760	-5.8
CHEMBL58760	-5.8
CHEMBL58760	-5.8
DB00207	-5.8
DB00361	-5.8
DB00361	-5.8
DB00541	-5.8
DB00746	-5.8
DB01076	-5.8
DB04845	-5.8
DB06827	-5.8
CHEMBL293562	-5.7
CHEMBL293562	-5.7
CHEMBL293562	-5.7
CHEMBL331808	-5.7
CHEMBL339562	-5.7
CHEMBL432984	-5.7
DB00309	-5.7
DB00361	-5.7
DB00541	-5.7
DB00570	-5.7
DB01076	-5.7
DB01220	-5.7
DB01764	-5.7
DB06772	-5.7
DB06772	-5.7
DB06772	-5.7
DB06827	-5.7
DB06827	-5.7
CHEMBL331808	-5.6
CHEMBL339562	-5.6
CHEMBL339562	-5.6
CHEMBL564642	-5.6
CHEMBL564642	-5.6
CHEMBL564642	-5.6
CHEMBL564642	-5.6
CHEMBL564642	-5.6
DB00538	-5.6
DB00538	-5.6
DB00570	-5.6
DB00947	-5.6
DB00947	-5.6
DB01764	-5.6
DB08965	-5.6
DB09049	-5.6
DB00207	-5.5
DB00309	-5.5
DB00538	-5.5
DB00538	-5.5
DB00541	-5.5
DB00570	-5.5
DB00570	-5.5
DB01201	-5.5
DB05109	-5.5
DB06772	-5.5
DB06772	-5.5
DB09049	-5.5
DB09049	-5.5
CHEMBL564642	-5.4
CHEMBL564642	-5.4
CHEMBL564642	-5.4
CHEMBL564642	-5.4
DB00207	-5.4
DB00207	-5.4
DB00309	-5.4
DB00309	-5.4
DB00309	-5.4
DB00361	-5.4
DB00361	-5.4
DB00538	-5.4
DB00538	-5.4
DB00615	-5.4
DB01201	-5.4
DB01220	-5.4
DB08965	-5.4
DB09296	-5.4
CHEMBL339562	-5.3
CHEMBL454263	-5.3
DB00207	-5.3
DB00207	-5.3
DB00309	-5.3
DB00538	-5.3
DB00538	-5.3
DB00538	-5.3
DB00541	-5.3
DB00570	-5.3
DB08965	-5.3
DB08965	-5.3
DB09049	-5.3
DB09049	-5.3
CHEMBL454263	-5.2
DB00207	-5.2
DB00541	-5.2
DB00541	-5.2
DB00570	-5.2
DB00570	-5.2
DB00615	-5.2
DB01045	-5.2
DB01764	-5.2
DB05109	-5.2
DB06772	-5.2
DB09049	-5.2
DB09049	-5.2
DB09049	-5.2
CHEMBL454263	-5.1
DB00570	-5.1
DB00615	-5.1
DB01045	-5.1
DB01764	-5.1
DB05109	-5.1
DB08965	-5.1
DB09296	-5.1
DB09296	-5.1
DB00207	-5
DB00570	-5
DB00615	-5
DB00868	-5
DB01045	-5
DB01201	-5
DB01201	-5
DB01764	-5
DB09296	-5
CHEMBL454263	-4.9
DB08965	-4.9
DB09296	-4.9
CHEMBL454263	-4.8
DB00207	-4.8
DB00361	-4.8
DB00361	-4.8
DB00868	-4.8
DB00868	-4.8
DB01045	-4.8
DB01201	-4.8
CHEMBL454263	-4.7
DB00868	-4.7
DB01045	-4.7
DB01045	-4.7
DB01201	-4.7
DB01764	-4.7
DB06804	-4.7
DB09296	-4.7
CHEMBL454263	-4.6
DB00868	-4.6
DB00868	-4.6
DB06804	-4.6
DB06804	-4.6
DB09296	-4.6
DB00868	-4.5
DB00868	-4.5
DB00868	-4.5
DB01045	-4.5
DB01045	-4.5
DB06804	-4.5
DB06804	-4.5
DB00615	-4.4
DB06804	-4.4
DB06804	-4.4
DB06804	-4.4
DB06804	-4.4
DB08965	-4.2
DB00615	-4.1
DB01201	-4
DB08965	-4
DB08965	-4
DB01201	-3.7
DB01201	-3.7
